# Supplementary material for: An asymmetric centromeric nucleosome
Source: eLife journal article supplement (doi:10.7554/elife.37911), 2018-08-23

PKY5470, LEU2, CSE4-wt

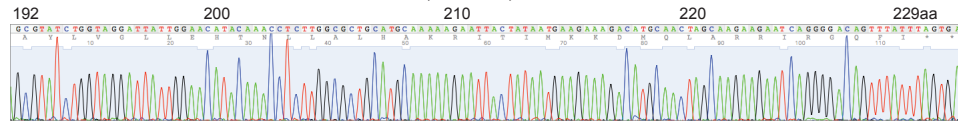

PKY5234, LEU2, cse4-X

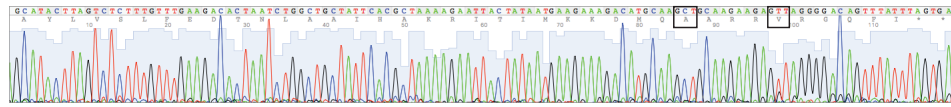

PKY5234, TRP1, cse4-Y

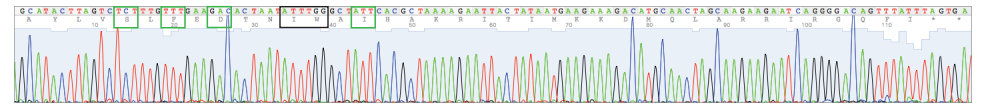

PKY5473, LEU2, Chimera

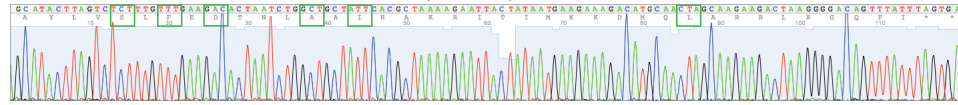

PKY5476, LEU2, cse4-X

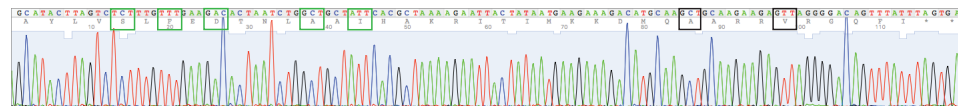

PKY5476, TRP1, cse4-Y

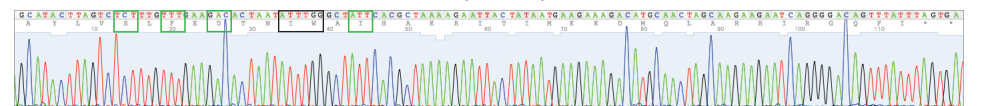

PKY5485, LEU2, cse4-Δ70-X

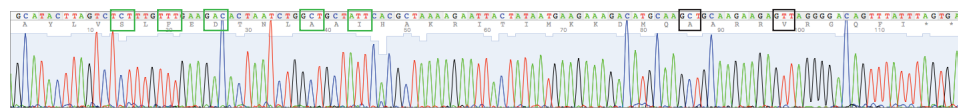

PKY5485, TRP1, cse4-Y

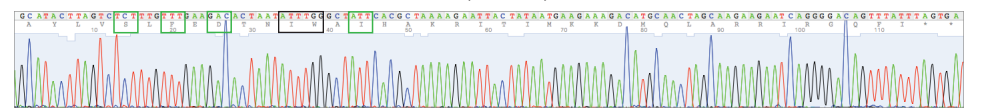

PKY5488, LEU2, cse4-X

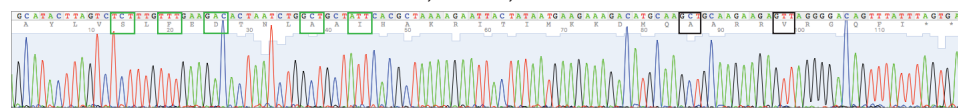

PKY5488, TRP1, cse4-Δ70-Y

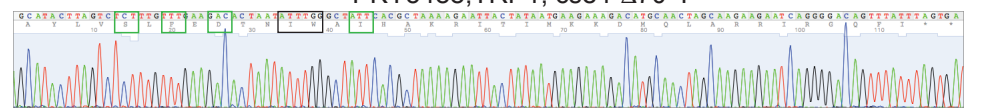

PKY5491, LEU2, cse4-ERS

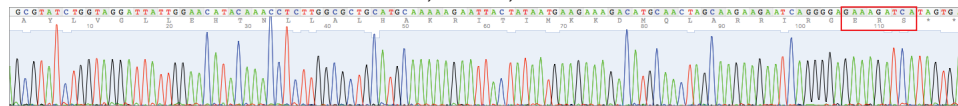

PKY5494, LEU2, Chimera-ERS

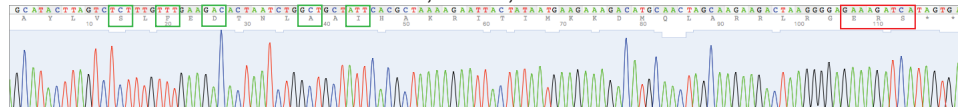

PKY5497, LEU2, X-ERS

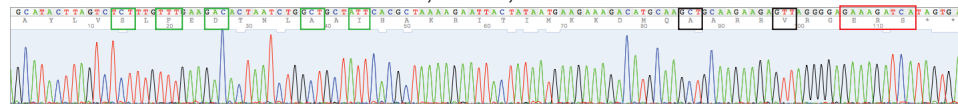

PKY5497, TRP1, cse4-Y

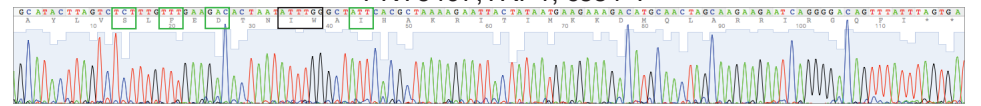

PKY5500, LEU2, cse4-X

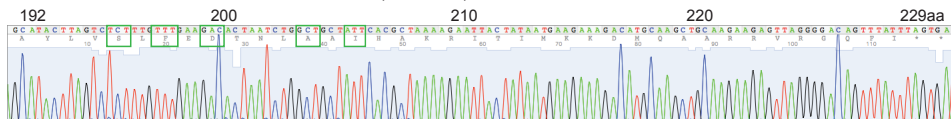

PKY5500,TRP1, cse4-Y-ERS

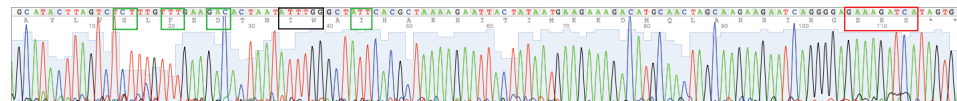

PKY5503, LEU2, cse4-X-ERS

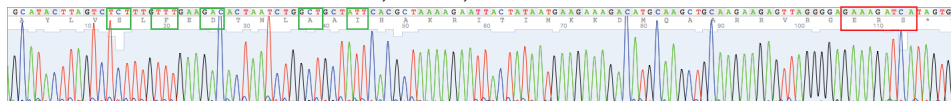

PKY5503,TRP1, cse4-Y-ERS

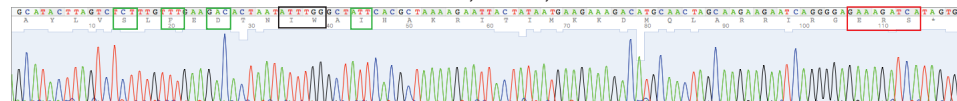

PKY5506, LEU2, cse4-ERS\*

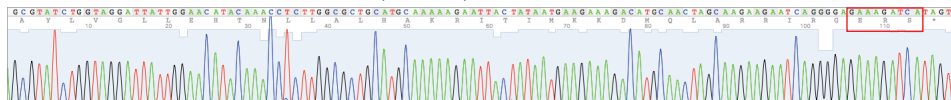

PKY5509, LEU2, cse4-X-ERS\*

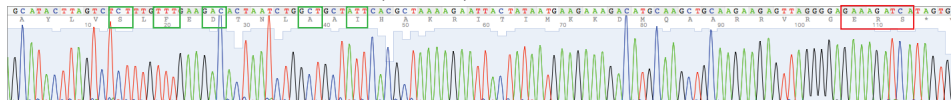

PKY5509, TRP1, cse4-Y

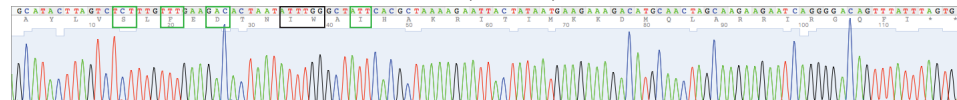

PKY5512, LEU2, cse4-X

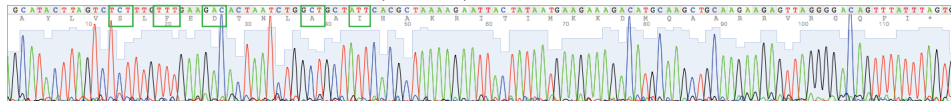

PKY5512, TRP1, cse4-Y-ERS\*

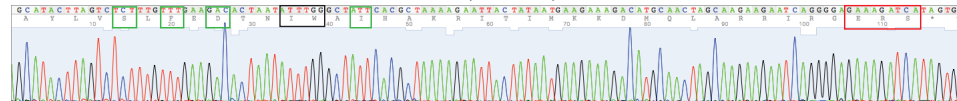

PKY5515, LEU2, cse4-Δ70-X-ERS\*

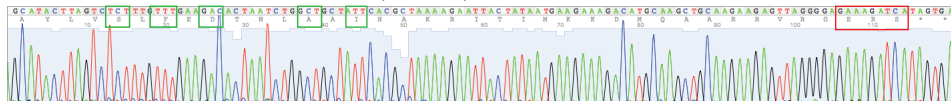

PKY5515, TRP1, cse4-Y

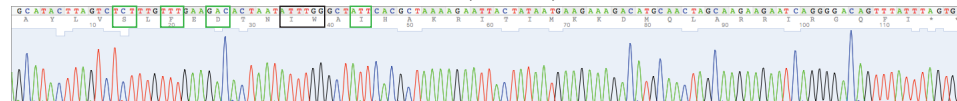

PKY5518, LEU2, cse4-X

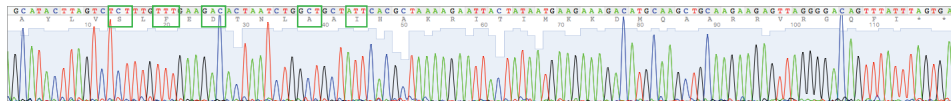

PKY5518, TRP1, cse4-Δ70-Y-ERS\*

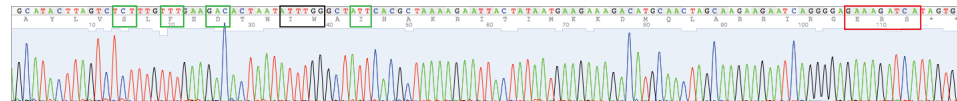

PKY5524, LEU2, cse4-Δ70-X

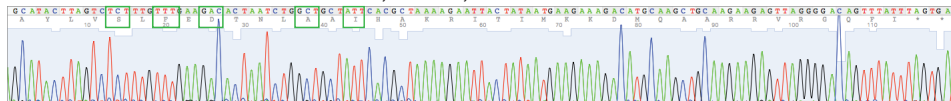

PKY5524, TRP1, cse4-Y-ERS\*

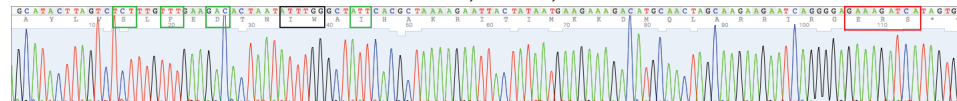

Supplement: supp [file elife-37911-supp-v1.zip › elife_poa_e37911_Figure_4_figure_supplement_3.pdf]
