# Supplementary material for: An asymmetric centromeric nucleosome
Source: PubMed Central journal article supplement (PMC6125124; doi:10.7554/elife.37911), 2018-08-23
Supplement: elife-37911-supp1.pdf [file elife-37911-supp1.pdf]

**Table S1. Strain list**

| Strain number                   | Description                                                                                                                                                                                                                                          | Parent                                  |
|---------------------------------|------------------------------------------------------------------------------------------------------------------------------------------------------------------------------------------------------------------------------------------------------|-----------------------------------------|
| PKY2160                         | <i>MATa; leu2-3, 112; ura3-1; his3-11,15; trp1-1; ade2-1; can1-100;</i><br><i>cse4::kanMX; p<sub>cse4</sub>-107-HA-URA3</i>                                                                                                                          | W303 background<br>(Sharp et al. 2002). |
| PKY5394                         | + pRS413 = ( <i>HIS3, CEN/ARS</i> )                                                                                                                                                                                                                  | PKY2160                                 |
| PKY5230<br>(Wild-type)          | + pPK796 = ( <i>CSE4 wild type, LEU2, CEN/ARS</i> )<br>+ pRS414 = ( <i>TRP1, CEN/ARS</i> )                                                                                                                                                           | PKY2160                                 |
| PKY5232<br>(Chimera)            | + pPK819 = ( <i>cse4 (G196S, L198F, H200D, L204A, L206I, I224L), LEU2, CEN/ARS</i> )<br>+ pRS414 = ( <i>TRP1, CEN/ARS</i> )                                                                                                                          | PKY2160                                 |
| PKY5234<br>(X + Y)              | + pPK820 = ( <i>cse4 (G196S, L198F, H200D, L204A, L206I, L220A, I224V), LEU2, CEN/ARS</i> )<br>+ pPK815 = ( <i>cse4 (G196S, L198F, H200D, L203I, L204W, L206I), TRP1, CEN/ARS</i> )                                                                  | PKY2160                                 |
| PKY5470<br>(Wild-type)          | + pPK796 = ( <i>CSE4 wild type, LEU2, CEN/ARS</i> )<br>+ pRS414 = ( <i>TRP1, CEN/ARS</i> )<br>+ pRS413 = ( <i>HIS3, CEN/ARS</i> )                                                                                                                    | PKY5394                                 |
| PKY5473<br>(Chimera)            | + pPK819 = ( <i>cse4 (G196S, L198F, H200D, L204A, L206I, I224L), LEU2, CEN/ARS</i> )<br>+ pRS414 = ( <i>TRP1, CEN/ARS</i> )<br>+ pRS413 = ( <i>HIS3, CEN/ARS</i> )                                                                                   | PKY5394                                 |
| PKY5476<br>(X + Y)              | + pPK820 = ( <i>cse4 (G196S, L198F, H200D, L204A, L206I, L220A, I224V), LEU2, CEN/ARS</i> )<br>+ pPK815 = ( <i>cse4 (G196S, L198F, H200D, L203I, L204W, L206I), TRP1, CEN/ARS</i> )<br>+ pRS413 = ( <i>HIS3, CEN/ARS</i> )                           | PKY5394                                 |
| PKY5485<br>( $\Delta 70X + Y$ ) | + pPK948 = ( <i>cse4 (<math>\Delta 1-70</math>, G196S, L198F, H200D, L204A, L206I, L220A, I224V), LEU2, CEN/ARS</i> )<br>+ pPK815 = ( <i>cse4 (G196S, L198F, H200D, L203I, L204W, L206I), TRP1, CEN/ARS</i> )<br>+ pRS413 = ( <i>HIS3, CEN/ARS</i> ) | PKY5394                                 |
| PKY5488<br>(X + $\Delta 70Y$ )  | + pPK820 = ( <i>cse4 (G196S, L198F, H200D, L204A, L206I, L220A, I224V), LEU2, CEN/ARS</i> )<br>+ pPK949 = ( <i>cse4 (<math>\Delta 1-70</math>, G196S, L198F, H200D, L203I, L204W, L206I), TRP1, CEN/ARS</i> )<br>+ pRS413 = ( <i>HIS3, CEN/ARS</i> ) | PKY5394                                 |
| PKY5491<br>(Cse4 ERS)           | + pPK957 = ( <i>cse4 (Q227E, F228R, I229S), LEU2, CEN/ARS</i> )<br>+ pRS414 = ( <i>TRP1, CEN/ARS</i> )<br>+ pRS413 = ( <i>HIS3, CEN/ARS</i> )                                                                                                        | PKY5394                                 |
| PKY5494<br>(Chimera ERS)        | + pPK953 = ( <i>cse4 (G196S, L198F, H200D, L204A, L206I, I224L, Q227E, F228R, I229S), LEU2, CEN/ARS</i> )<br>+ pRS414 = ( <i>TRP1, CEN/ARS</i> )<br>+ pRS413 = ( <i>HIS3, CEN/ARS</i> )                                                              | PKY5394                                 |

|                                                  |                                                                                                                                                                                                                                                                                       |         |
|--------------------------------------------------|---------------------------------------------------------------------------------------------------------------------------------------------------------------------------------------------------------------------------------------------------------------------------------------|---------|
| PKY5497<br><br>(X ERS + Y)                       | + pPK951 = ( <i>cse4</i> (G196S, L198F, H200D, L204A, L206I, L220A, I224V, Q227E, F228R, I229S), LEU2, CEN/ARS)<br><br>+ pPK815 = ( <i>cse4</i> (G196S, L198F, H200D, L203I, L204W, L206I), TRP1, CEN/ARS)<br><br>+ pRS413 = (HIS3, CEN/ARS)                                          | PKY5394 |
| PKY5500<br><br>(X + Y ERS)                       | + pPK820 = ( <i>cse4</i> (G196S, L198F, H200D, L204A, L206I, L220A, I224V), LEU2, CEN/ARS)<br><br>+ pPK952 = ( <i>cse4</i> (G196S, L198F, H200D, L203I, L204W, L206I, Q227E, F228R, I229S), TRP1, CEN/ARS)<br><br>+ pRS413 = (HIS3, CEN/ARS)                                          | PKY5394 |
| PKY5503<br><br>(X ERS + Y ERS)                   | + pPK951 = ( <i>cse4</i> (G196S, L198F, H200D, L204A, L206I, L220A, I224V, Q227E, F228R, I229S), LEU2, CEN/ARS)<br><br>+ pPK952 = ( <i>cse4</i> (G196S, L198F, H200D, L203I, L204W, L206I, Q227E, F228R, I229S), TRP1, CEN/ARS)<br><br>+ pRS413 = (HIS3, CEN/ARS)                     | PKY5394 |
| PKY5506<br><br>(Cse4 L1-ERS)                     | + pPK969 = ( <i>cse4</i> ( $\Delta$ 172-174, W178F, Q227E, F228R, I229S), LEU2, CEN/ARS)<br><br>+ pRS414 = (TRP1, CEN/ARS)<br><br>+ pRS413 = (HIS3, CEN/ARS)                                                                                                                          | PKY5394 |
| PKY5509<br><br>(X L1-ERS + Y)                    | + pPK966 = ( <i>cse4</i> ( $\Delta$ 172-174, W178F, G196S, L198F, H200D, L204A, L206I, L220A, I224V, Q227E, F228R, I229S), LEU2, CEN/ARS)<br><br>+ pPK815 = ( <i>cse4</i> (G196S, L198F, H200D, L203I, L204W, L206I), TRP1, CEN/ARS)<br><br>+ pRS413 = (HIS3, CEN/ARS)                | PKY5394 |
| PKY5512<br><br>(X + Y L1-ERS)                    | + pPK820 = ( <i>cse4</i> (G196S, L198F, H200D, L204A, L206I, L220A, I224V), LEU2, CEN/ARS)<br><br>+ pPK967 = ( <i>cse4</i> ( $\Delta$ 172-174, W178F, G196S, L198F, H200D, L203I, L204W, L206I, Q227E, F228R, I229S), TRP1, CEN/ARS)<br><br>+ pRS413 = (HIS3, CEN/ARS)                | PKY5394 |
| PKY5515<br><br>( $\Delta$ 70X L1-ERS<br><br>+ Y) | + pPK964 = ( <i>cse4</i> ( $\Delta$ 1-70, $\Delta$ 172-174, W178F, G196S, L198F, H200D, L204A, L206I, L220A, I224V, Q227E, F228R, I229S), LEU2, CEN/ARS)<br><br>+ pPK815 = ( <i>cse4</i> (G196S, L198F, H200D, L203I, L204W, L206I), TRP1, CEN/ARS)<br><br>+ pRS413 = (HIS3, CEN/ARS) | PKY5394 |
| PKY5518<br><br>(X<br><br>+ $\Delta$ 70Y L1-ERS)  | + pPK820 = ( <i>cse4</i> (G196S, L198F, H200D, L204A, L206I, L220A, I224V), LEU2, CEN/ARS)<br><br>+ pPK965 = ( <i>cse4</i> ( $\Delta$ 1-70, $\Delta$ 172-174, W178F, G196S, L198F, H200D, L203I, L204W, L206I, Q227E, F228R, I229S), TRP1, CEN/ARS)<br><br>+ pRS413 = (HIS3, CEN/ARS) | PKY5394 |
| PKY5521<br><br>(X L1-ERS)                        | + pPK966 = ( <i>cse4</i> ( $\Delta$ 172-174, W178F, G196S, L198F, H200D, L204A, L206I, L220A, I224V, Q227E, F228R, I229S), LEU2, CEN/ARS)                                                                                                                                             | PKY5394 |

|                                                |                                                                                                                                                                                                                                                                                                                     |         |
|------------------------------------------------|---------------------------------------------------------------------------------------------------------------------------------------------------------------------------------------------------------------------------------------------------------------------------------------------------------------------|---------|
| + Δ70Y)                                        | <p>+ pPK949 = (<i>cse4</i> (Δ1-70, G196S, L198F, H200D, L203I, L204W, L206I), <i>TRP1</i>, <i>CEN/ARS</i>)</p> <p>+ pRS413 = (<i>HIS3</i>, <i>CEN/ARS</i>)</p>                                                                                                                                                      |         |
| <p>PKY5524</p> <p>(Δ70X</p> <p>+ Y L1-ERS)</p> | <p>+ pPK948 = (<i>cse4</i> (Δ1-70, G196S, L198F, H200D, L204A, L206I, L220A, I224V), <i>LEU2</i>, <i>CEN/ARS</i>)</p> <p>+ pPK967 = (<i>cse4</i> (Δ172-174, W178F, G196S, L198F, H200D, L203I, L204W, L206I, Q227E, F228R, I229S), <i>TRP1</i>, <i>CEN/ARS</i>)</p> <p>+ pRS413 = (<i>HIS3</i>, <i>CEN/ARS</i>)</p> | PKY5394 |
