# Supplementary material for: An asymmetric centromeric nucleosome
Source: eLife journal article supplement (doi:10.7554/elife.37911), 2018-08-23
Supplement: supp [file elife-37911-supp-v1.zip]

Archive with 9 entries (9 files):
- elife_poa_e37911_Figure_4_figure_supplement_1.pdf
- elife_poa_e37911_Figure_4_figure_supplement_2.pdf
- elife_poa_e37911_Figure_1_figure_supplement_2.pdf
- elife_poa_e37911_Figure_1_figure_supplement_5.pdf
- elife_poa_e37911_Figure_1_figure_supplement_3.pdf
- elife_poa_e37911_Figure_4_figure_supplement_3.pdf
- elife_poa_e37911_Figure_1_figure_supplement_4.pdf
- elife_poa_e37911_Figure_1_figure_supplement_1.pdf
- elife_poa_e37911_Transparent_Reporting_File.docx
