# Supplementary figures and images for: An asymmetric centromeric nucleosome
Source: eLife journal article supplement (doi:10.7554/elife.37911), 2018-08-23

FOA 3 days

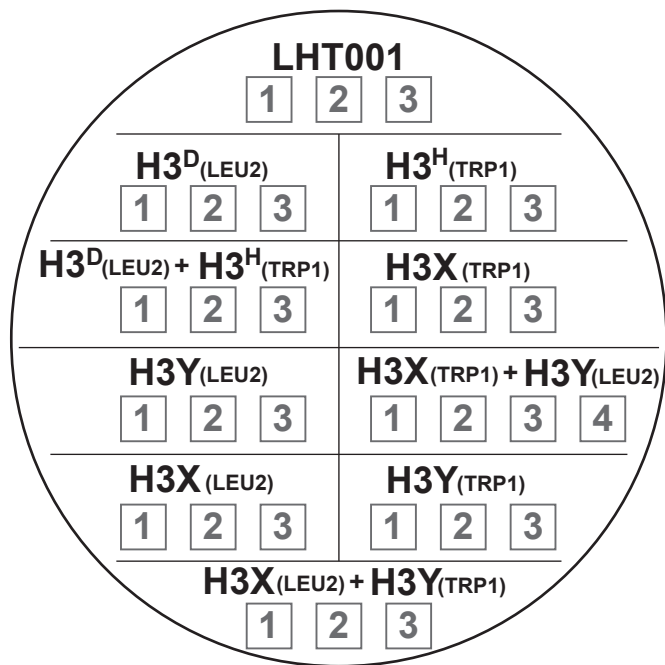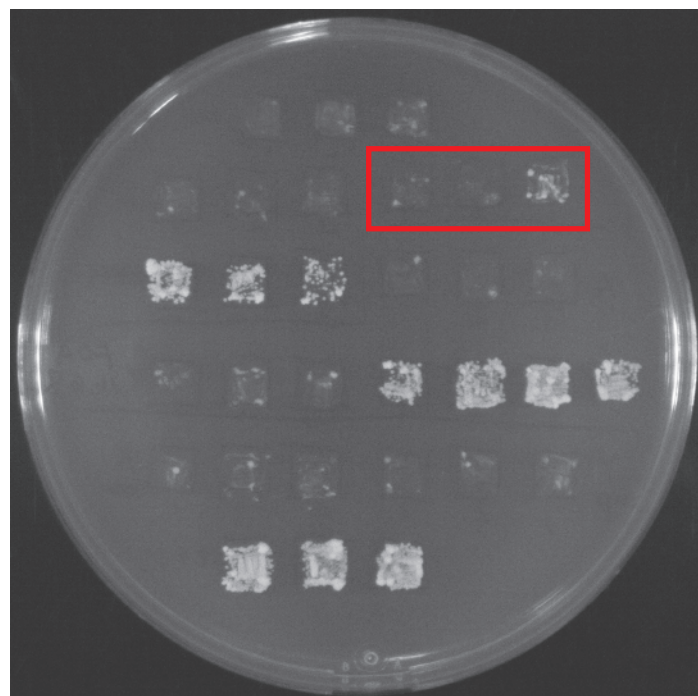

FOA 4 days

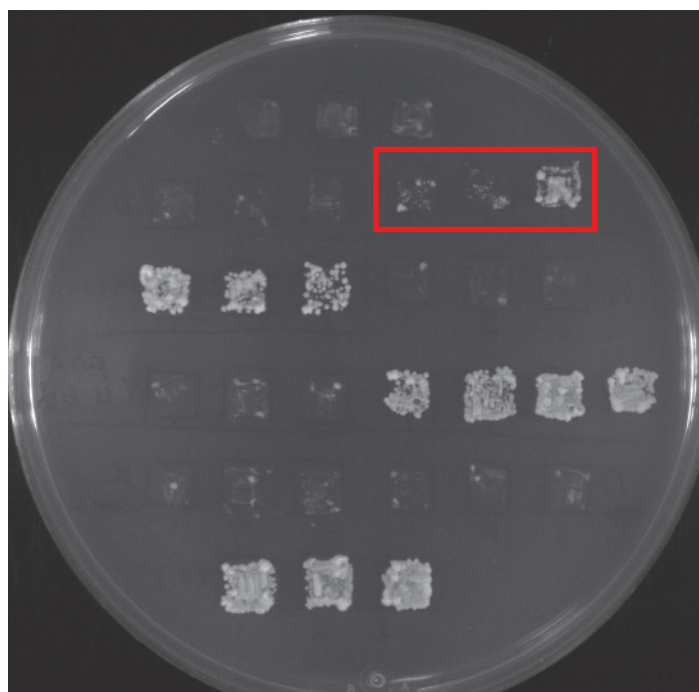

FOA 5 days

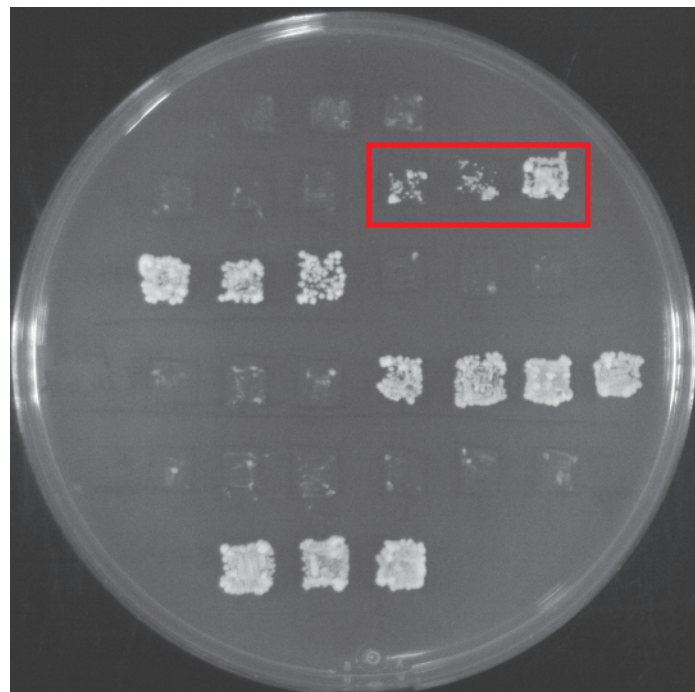

Supplement: supp [file elife-37911-supp-v1.zip]

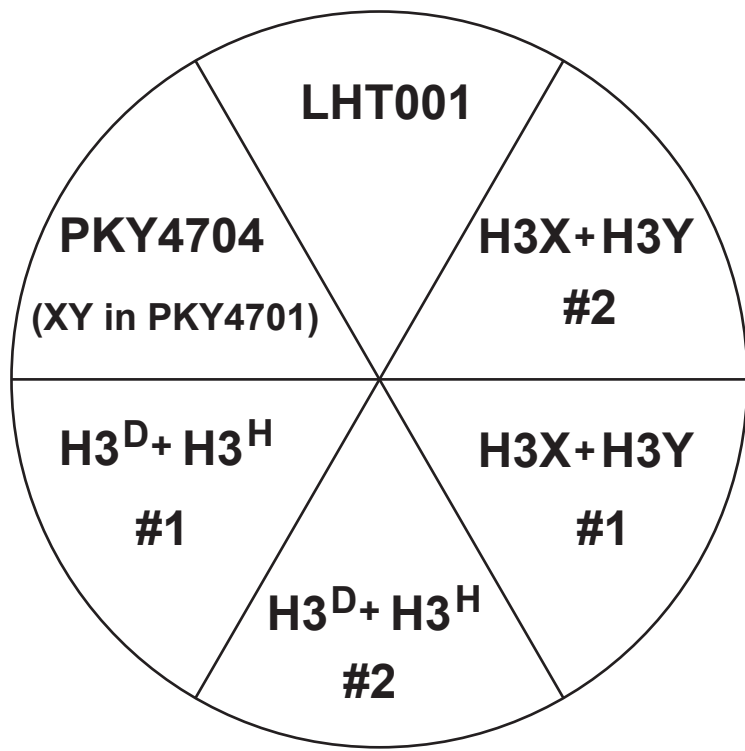

**YPD 30°C**

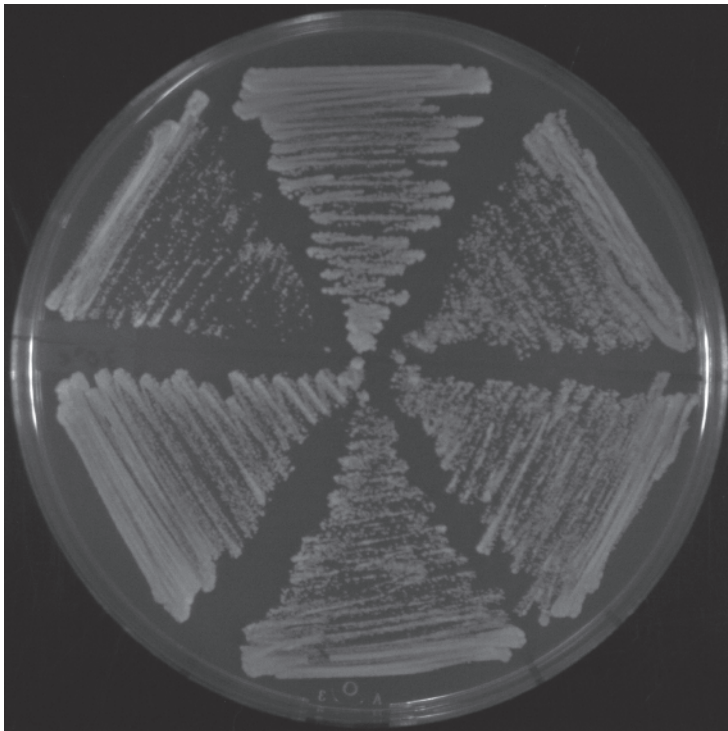

**YPD 37°C**

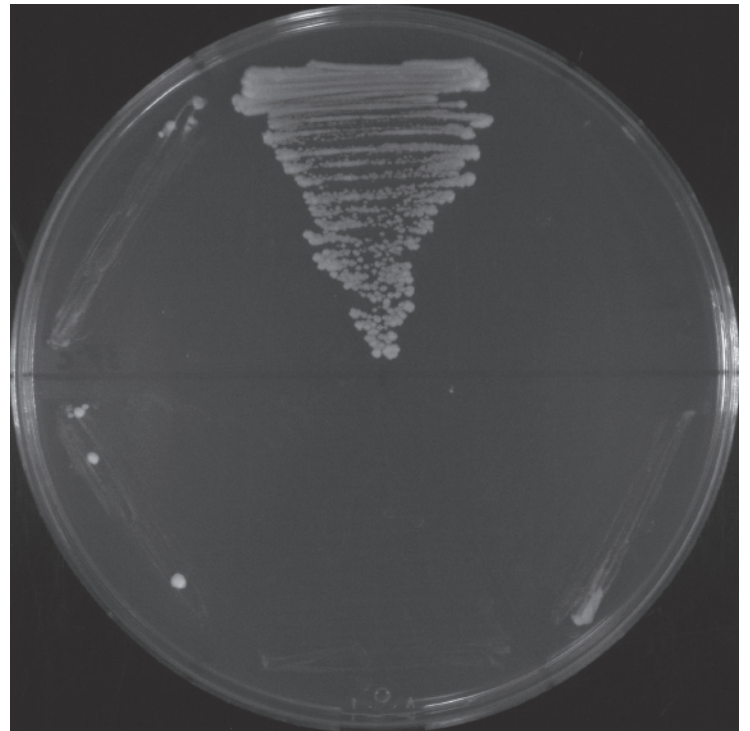

Supplement: supp [file elife-37911-supp-v1.zip]

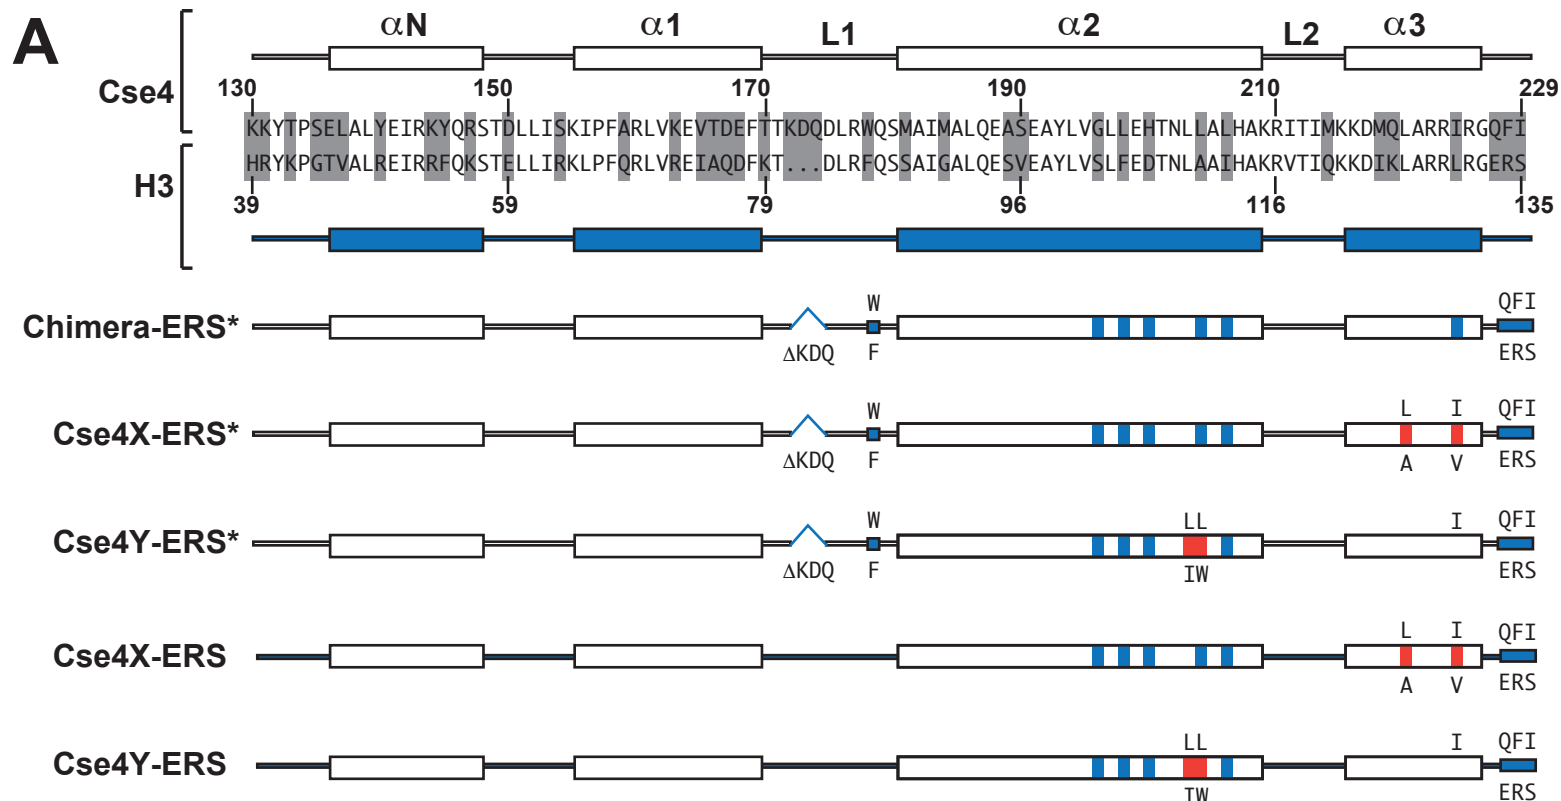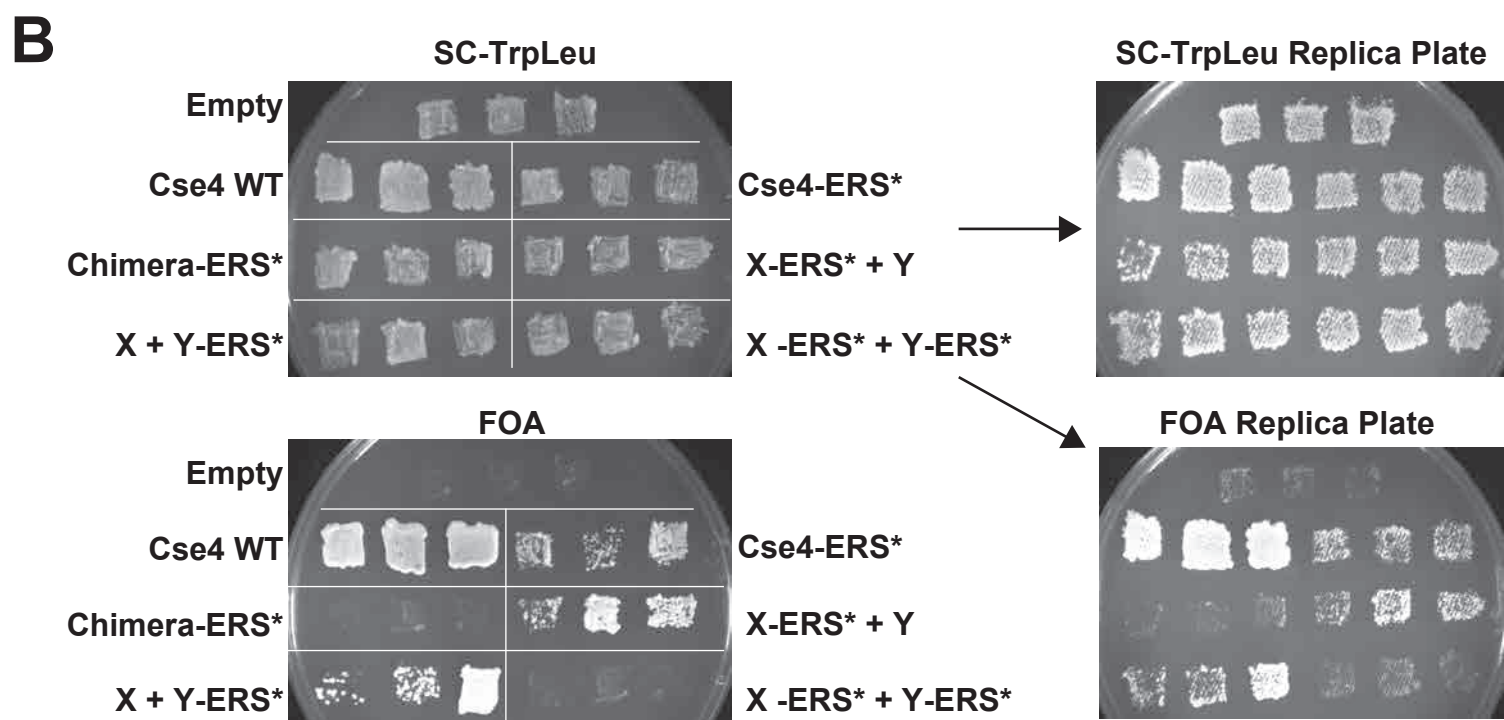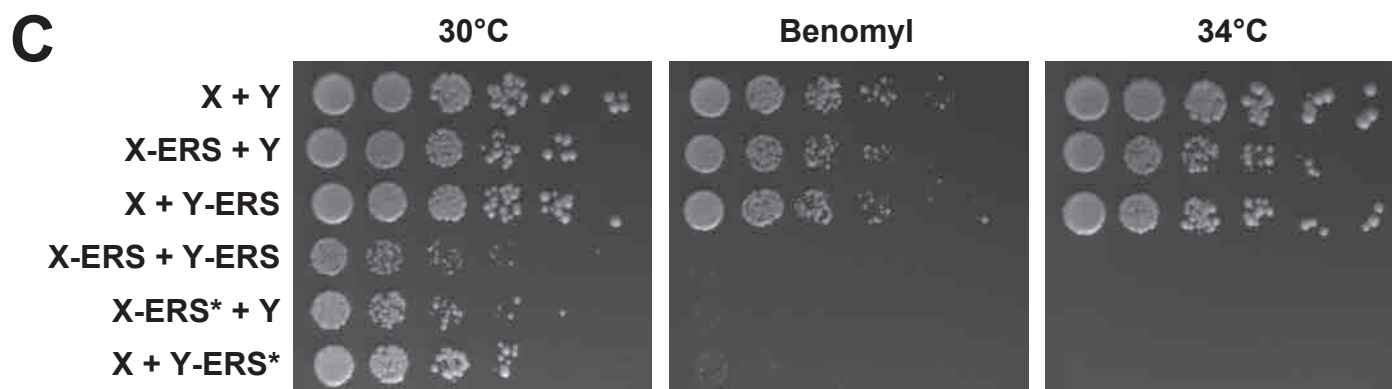

Supplement: supp [file elife-37911-supp-v1.zip]

**A**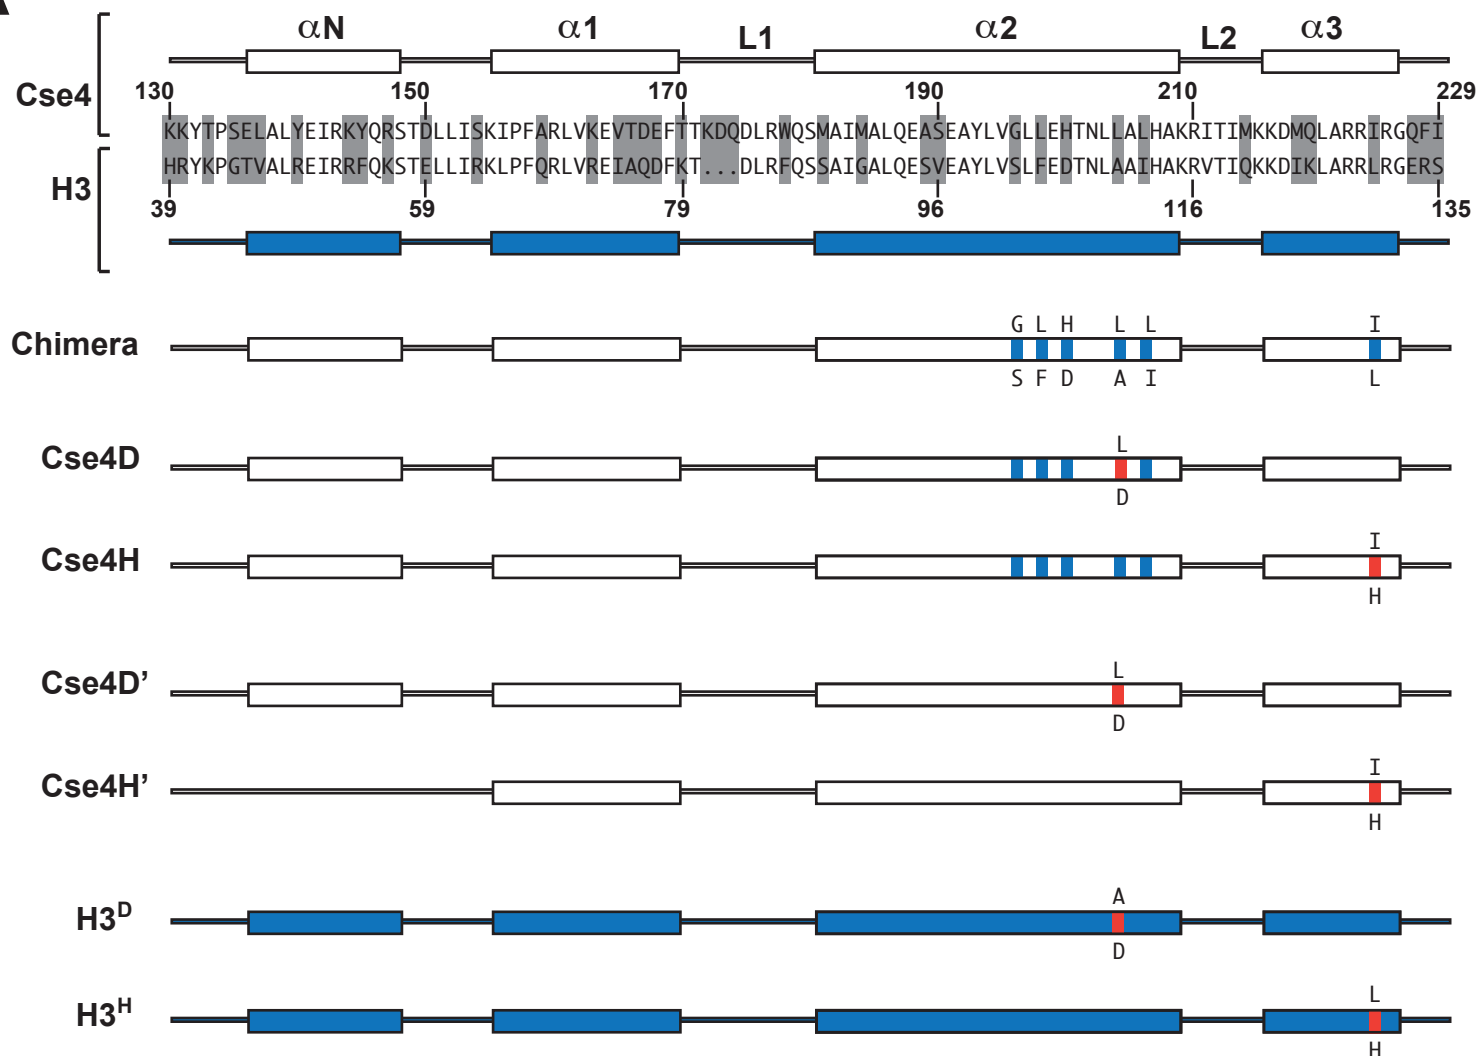**B**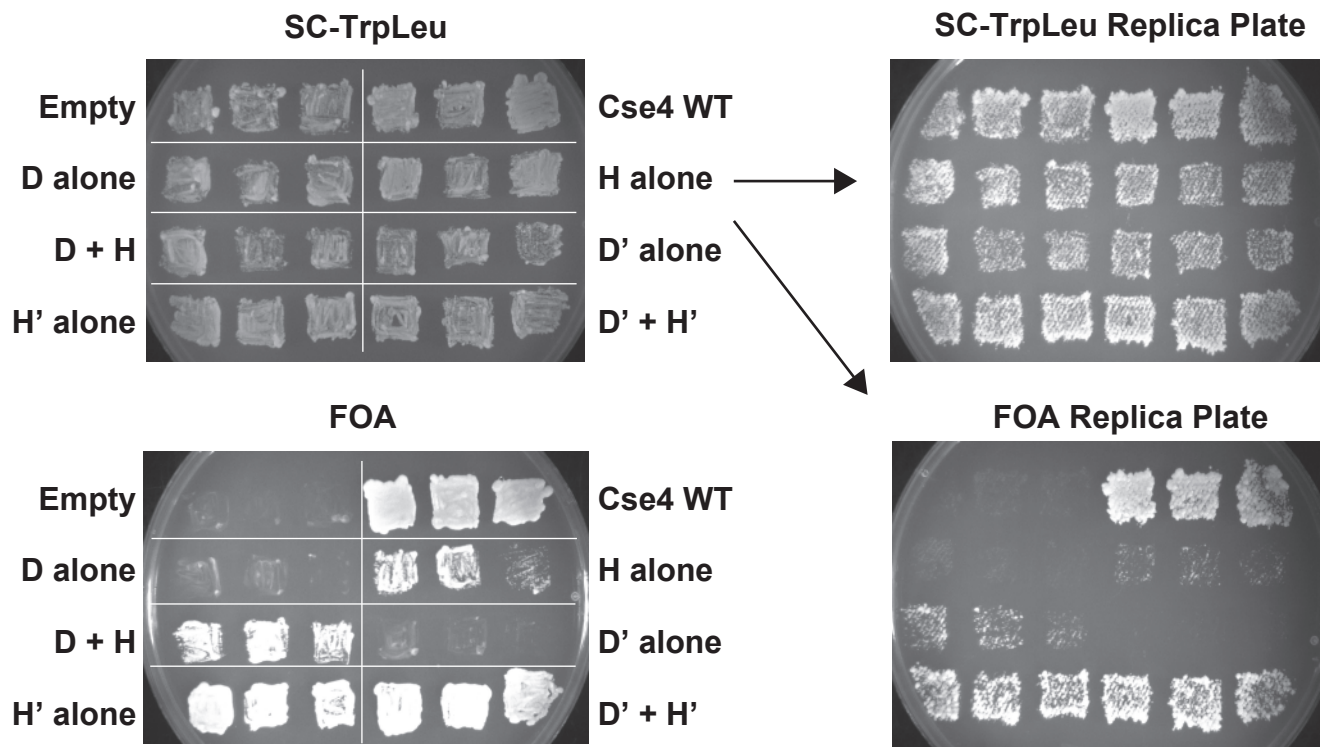

Supplement: supp [file elife-37911-supp-v1.zip]

**A**

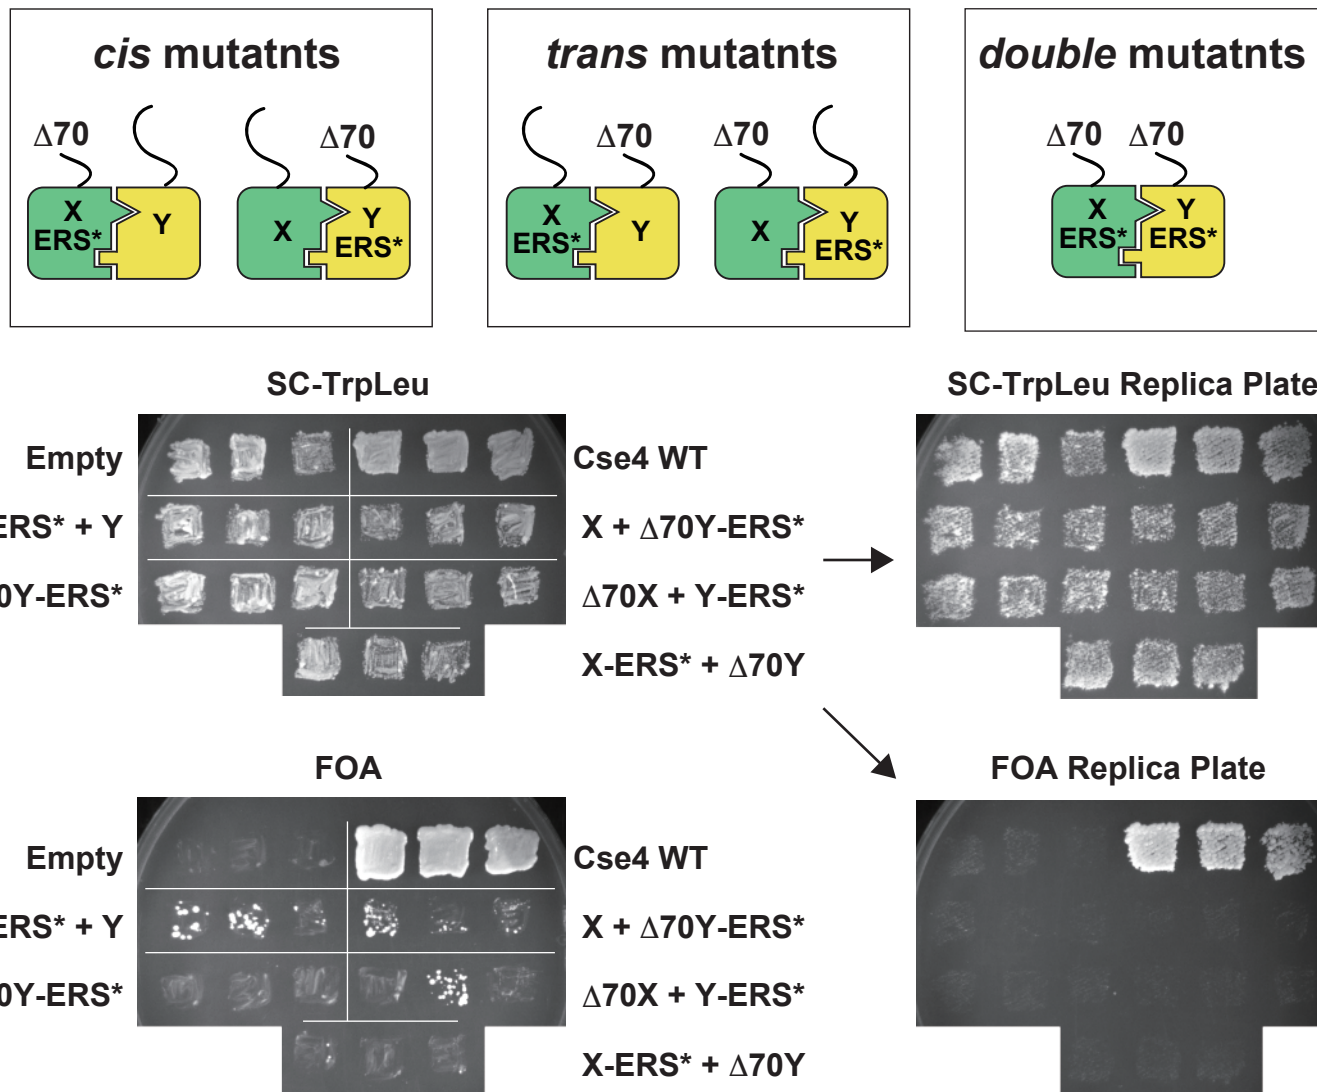

**B**

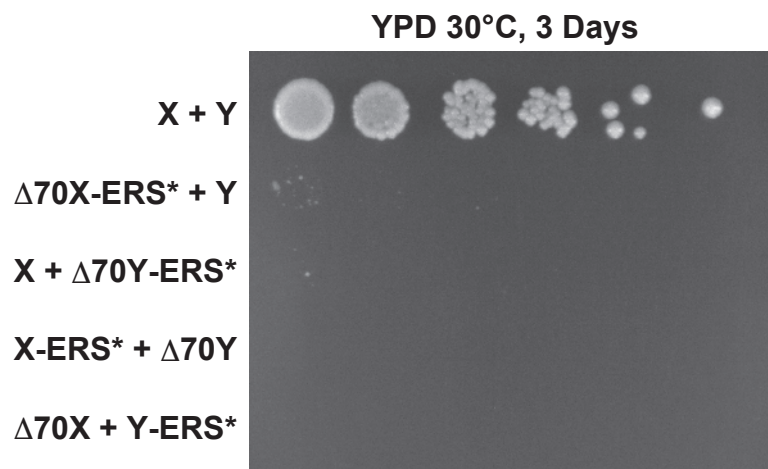

Supplement: supp [file elife-37911-supp-v1.zip › elife_poa_e37911_Figure_4_figure_supplement_2.pdf]

**A**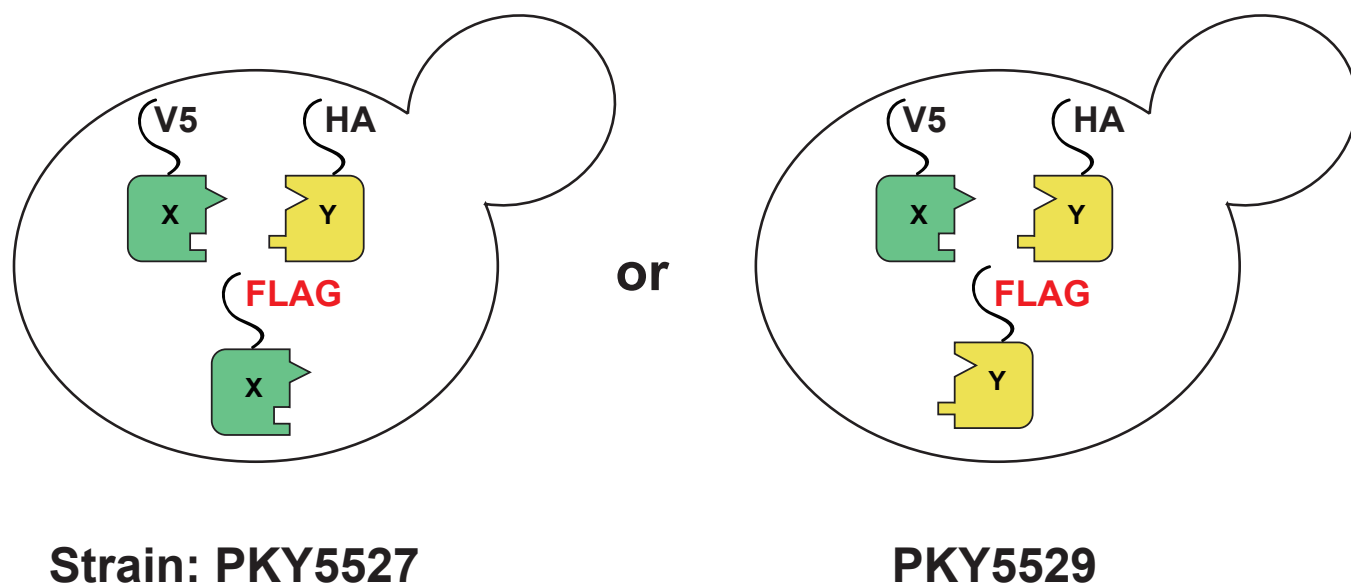

FLAG-IP and immunoblotting

**B**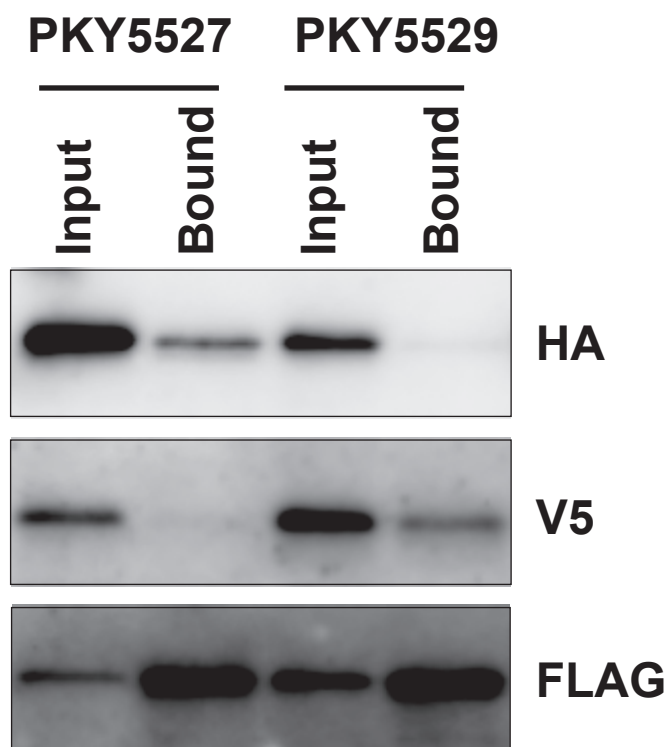

Supplement: supp [file elife-37911-supp-v1.zip › elife_poa_e37911_Figure_1_figure_supplement_5.pdf]

# A

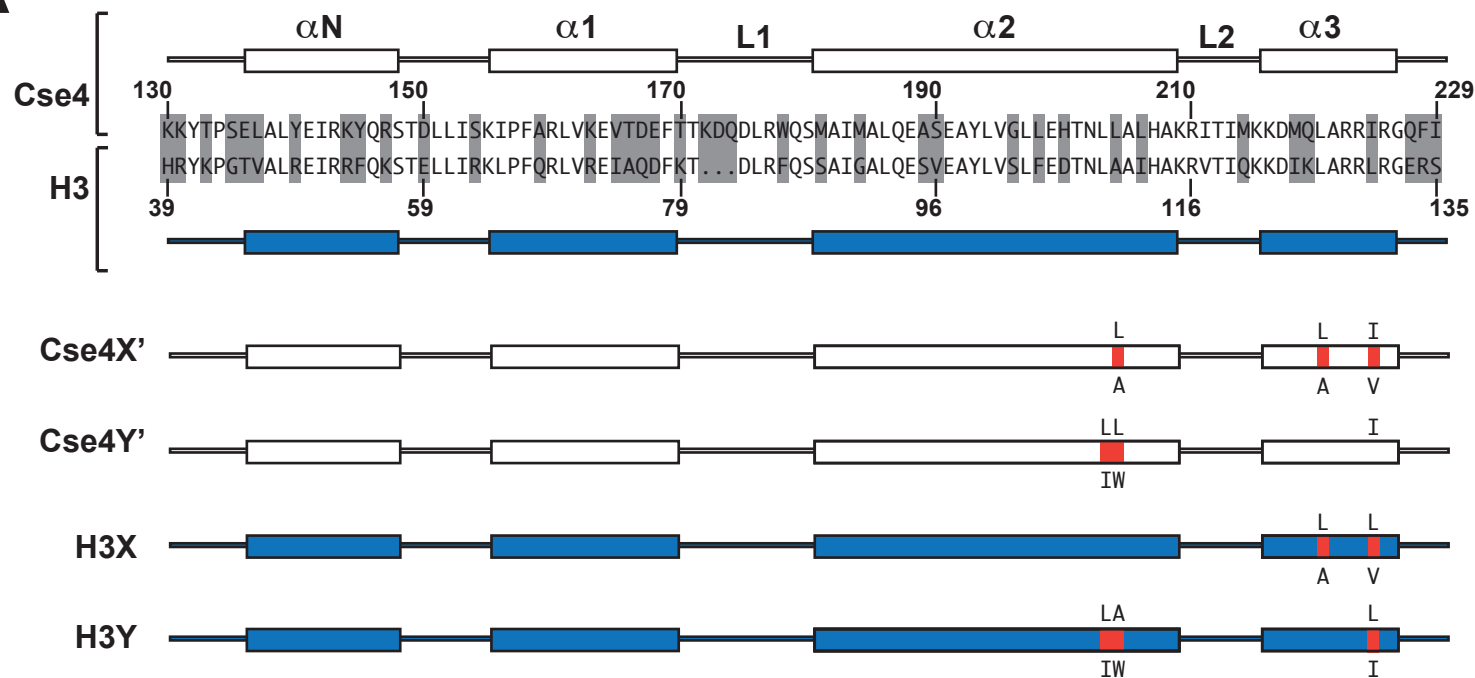

# B

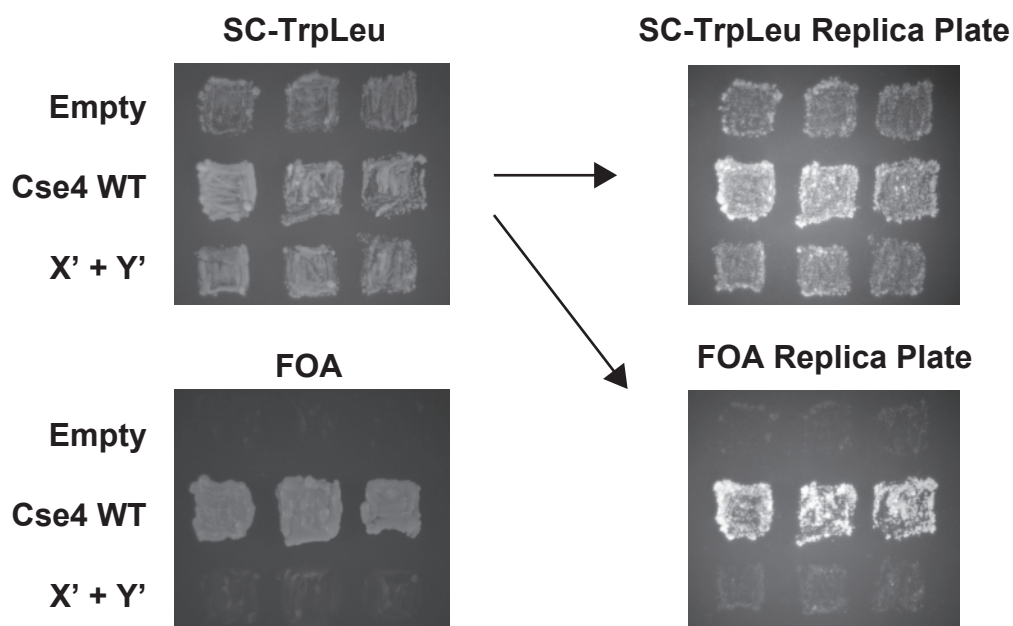

Supplement: supp [file elife-37911-supp-v1.zip › elife_poa_e37911_Figure_1_figure_supplement_1.pdf]
